# Supplementary material for: Pharmacological and Somatic Treatment Effects on Suicide in Adults: A Systematic Review and Meta-Analysis
Source: Atypon-hosted journal article supplement (doi:10.1176/appi.focus.23021006), 2023-04-01
Supplement: appi.focus.23021006.ds007.pdf [file appi.focus.23021006.ds007.pdf]

Table S1. Characteristics of Lithium studies

| Study            | Type of study |              |              | Indication for treatment     | Intervention group | Comparison group                                                  | Total Sample Size | Appraisal of Quality (Newcastle-Ottawa Scale) |                           |                     |             |
|------------------|---------------|--------------|--------------|------------------------------|--------------------|-------------------------------------------------------------------|-------------------|-----------------------------------------------|---------------------------|---------------------|-------------|
|                  | RCT           | Case-control | Cohort study |                              |                    |                                                                   |                   | Selection (range 0-4)                         | Comparability (range 0-2) | Outcome (range 0-3) | Total (0-9) |
| Greil, 1997      | X             |              |              | Bipolar                      | Lithium            | AED/MS (Carbamazepine)                                            | 175               | 4                                             | 2                         | 2                   | 8           |
| Sondergard, 2008 |               |              | X            | Bipolar                      | Lithium            | AED/MS (Divalproex)                                               | 464               | 4                                             | 0                         | 3                   | 7           |
| Ahearn, 2013     |               |              | X            | Bipolar                      | Lithium            | AED/MS (Divalproex) or Antipsychotic                              | 1,716             | 4                                             | 0                         | 3                   | 7           |
| Ahearn, 2013     |               |              | X            | Bipolar                      | Lithium            | No Lithium                                                        | 1,551             | 4                                             | 0                         | 3                   | 7           |
| Tsai, 2016       |               |              | X            | Bipolar                      | Lithium            | AED/MS (Divalproex/Carbamazepine)                                 | 2,200             | 4                                             | 2                         | 3                   | 9           |
| Collins, 2008    |               |              | X            | Bipolar                      | Lithium            | AED/MS (Divalproex/Gabapentin/Carbamazepine)                      | 11,787            | 4                                             | 0                         | 3                   | 7           |
| Calabrese, 2003  | X             |              |              | Bipolar                      | Lithium            | AED/MS (Lamotrigine)                                              | 342               | 4                                             | 2                         | 2                   | 8           |
| Licht, 2010      | X             |              |              | Bipolar                      | Lithium            | AED/MS (Lamotrigine)                                              | 155               | 4                                             | 2                         | 3                   | 9           |
| Tohen, 2005      | X             |              |              | Bipolar                      | Lithium            | Antipsychotic (Olanzapine)                                        | 431               | 4                                             | 2                         | 3                   | 9           |
| Prien, 1973a     | X             |              |              | Bipolar                      | Lithium            | Placebo/No lithium treatment                                      | 205               | 4                                             | 2                         | 3                   | 9           |
| Toffol, 2015     |               |              | X            | Bipolar                      | Lithium            | Placebo/No lithium treatment                                      | 826               | 4                                             | 1                         | 3                   | 8           |
| Tsai, 2016       |               |              | X            | Bipolar                      | Lithium            | Placebo/No lithium treatment                                      | 3,395             | 4                                             | 2                         | 3                   | 9           |
| Hayes, 2016      |               |              | X            | Bipolar disorder and MDD     | Lithium            | AED/MS (Valproate) or Antipsychotic (Olanzapine/Quetiapine)       | 6,671             | 4                                             | 2                         | 3                   | 9           |
| Ahlfors, 1981    | X             |              |              | Bipolar disorder and MDD     | Lithium            | Antipsychotic (Flupenthixol decanoate)                            | 219               | 3                                             | 2                         | 2                   | 7           |
| Smith, 2009      |               |              | X            | Mixed psychiatric disorders  | Li+Antipsy         | AED/MS (Carbamazepine/ Valproic acid/ Oxcarbazepine/ Lamotrigine) | 16,645            | 4                                             | 1                         | 2                   | 7           |
| Smith, 2014      |               |              | X            | Mood and psychotic disorders | Lithium            | AED/MS (Valproate)                                                | 42,388            | 4                                             | 2                         | 3                   | 9           |

|                            |   |   |   |                               |                      |                              |            |   |   |   |   |
|----------------------------|---|---|---|-------------------------------|----------------------|------------------------------|------------|---|---|---|---|
| Greil, 1997b               | X |   |   | Psychotic disorders           | Lithium              | AED/MS (Carbamazapine)       | 110        | 4 | 2 | 2 | 8 |
| Glen, 1984                 | X |   |   | Unipolar                      | Lithium              | Amitriptyline                | 107        | 4 | 2 | 2 | 8 |
| Greil, 1996                | X |   |   | Unipolar                      | Lithium              | Amitriptyline                | 81         | 4 | 2 | 2 | 8 |
| Felber, 1994               |   |   | X | Bipolar disorder and MDD      | Lithium              | Placebo/No lithium treatment | 36         | 2 | 0 | 2 | 4 |
| Kallner, 2000              |   |   | X | Bipolar disorder and MDD      | Lithium              | Placebo/No lithium treatment | 405        | 2 | 0 | 1 | 3 |
| Prien, 1973b               | X |   |   | Bipolar disorder and MDD      | Lithium              | Placebo/No lithium treatment | 84         | 4 | 2 | 3 | 9 |
| Bocchetta, 1998            |   |   | X | Mood and psychotic disorders  | Lithium              | Placebo/No lithium treatment | 100        | 2 | 0 | 2 | 4 |
| Coryell, 2001              |   | X |   | Mood and psychotic disorders  | Lithium              | Placebo/No lithium treatment | 30         | 2 | 0 | 3 | 5 |
| Müller-Oerlinghausen, 1992 |   |   | X | Mood and psychotic disorders  | Lithium              | Placebo/No lithium treatment | 68         | 2 | 0 | 2 | 4 |
| Nilsson, 1995              |   |   | X | Mood and psychotic disorders  | Lithium              | Placebo/No lithium treatment | 230        | 2 | 0 | 2 | 4 |
| Modestin, 1992             |   | X |   | Mood and psychotic disorders* | Lithium              | Placebo/No lithium treatment | 128        | 1 | 0 | 3 | 4 |
| Reutfors, 2013             |   | X |   | Psychotic disorders           | Lithium              | No lithium                   | 168        | 3 | 0 | 2 | 5 |
| Bauer, 2000                | X |   |   | Unipolar                      | Lithium augmentation | Placebo/No lithium treatment | 29         | 3 | 2 | 2 | 7 |
| Lauterbach, 2008           | X |   |   | Unipolar                      | Lithium              | Placebo/No lithium treatment | 167        | 4 | 2 | 3 | 9 |
| Song 2017                  |   |   | X | Bipolar                       | Lithium              | No lithium                   | 25,780     | 4 | 2 | 3 | 9 |
| Song 2017                  |   |   | X | Bipolar                       | Lithium              | AED/MS (Valproate)           | 29,540     | 4 | 2 | 3 | 9 |
| Goodwin 2003               |   |   | X | Bipolar disorder              | Lithium              | AED (CBZ, VPA)               | *23,930 PY | 4 | 1 | 2 | 8 |
| Goodwin 2003               |   |   | X | Bipolar disorder              | Lithium              | No lithium treatment         | *35,159 PY | 4 | 1 | 2 | 8 |
| Storosum 2005              | X |   |   | Bipolar disorder              | Lithium              | AED/MS or Antipsychotics     | 1,201      | 4 | 2 | 3 | 9 |

|               |   |  |   |                  |                      |                         |     |   |   |   |   |
|---------------|---|--|---|------------------|----------------------|-------------------------|-----|---|---|---|---|
| Coppen 1998   |   |  | X | Bipolar disorder | Lithium              | No lithium treatment    | 102 | 2 | 0 | 3 | 5 |
| Tondo 1998    |   |  | X | Bipolar disorder | Lithium              | No lithium treatment    | 310 | 2 | 0 | 3 | 5 |
| Bech 1976     |   |  | X | Mood disorders   | Lithium              | No lithium treatment    | 74  | 2 | 0 | 3 | 5 |
| Angst 2005    |   |  | X | Mood disorders   | Lithium              | No lithium treatment    | 220 | 2 | 0 | 2 | 4 |
| Girlanda 2014 | X |  |   | MDD              | Lithium + usual care | No lithium + usual care | 58  | 3 | 2 | 3 | 8 |

*\*Person counts could not be obtained from published literature. In this case, person-years (PY) is given. RCT – randomized controlled trial. MDD – major depressive disorder; AED/MS – antiepileptic drug/mood stabilizer*

Table S2. Characteristics of Clozapine studies

| Study          | Type of study |              |              | Indication for treatment | Intervention group | Comparison group        | Total Sample Size | Appraisal of Quality (Newcastle-Ottawa Scale) |                           |                     |             |
|----------------|---------------|--------------|--------------|--------------------------|--------------------|-------------------------|-------------------|-----------------------------------------------|---------------------------|---------------------|-------------|
|                | RCT           | Case-control | Cohort study |                          |                    |                         |                   | Selection (range 0-4)                         | Comparability (range 0-2) | Outcome (range 0-3) | Total (0-9) |
| Weitoft, 2014  |               | X            |              | Psychotic disorder       | Clozapine          | Haloperidol             | 26,046            | 4                                             | 0                         | 3                   | 7           |
| Reutfors, 2013 |               | X            |              | Psychotic disorder       | Clozapine          | No Clozapine            | 168               | 3                                             | 0                         | 2                   | 5           |
| Tiihonen, 2009 |               |              | X            | Psychotic disorder       | Clozapine          | Perphenazine            | *49,930 PY        | 4                                             | 2                         | 2                   | 8           |
| Sernyak, 2001  |               |              | X            | Psychotic disorder       | Clozapine          | No Clozapine            | 3,795             | 4                                             | 1                         | 2                   | 7           |
| Reid, 1998     |               |              | X            | Psychotic disorder       | Clozapine          | No Clozapine            | 30,983            | 3                                             | 0                         | 2                   | 5           |
| Walker, 1997   |               |              | X            | Psychotic disorder       | Clozapine          | Past Clozapine Exposure | *86,747 PY        | 3                                             | 0                         | 1                   | 4           |
| Meltzer, 2003  | X             |              |              | Psychotic disorder       | Clozapine          | Olanzapine              | 980               | 4                                             | 2                         | 3                   | 9           |

\*Person counts could not be obtained from published literature. In this case, person-years (PY) is given. RCT – randomized controlled trial.

Table S3. Characteristics of ECT studies

| Study                    | Type of study |              |              | Indication for treatment     | Intervention group | Comparison group | Total Sample Size | Appraisal of Quality (Newcastle-Ottawa Scale) |                           |                     |             |
|--------------------------|---------------|--------------|--------------|------------------------------|--------------------|------------------|-------------------|-----------------------------------------------|---------------------------|---------------------|-------------|
|                          | RCT           | Case-control | Cohort study |                              |                    |                  |                   | Selection (range 0-4)                         | Comparability (range 0-2) | Outcome (range 0-3) | Total (0-9) |
| Ahmadi, 2016             |               |              | X            | MDD + PTSD                   | ECT                | No ECT           | 3,485             | 4                                             | 0                         | 3                   | 7           |
| Avery, 1978              |               |              | X            | MDD                          | ECT                | No ECT           | 519               | 4                                             | 0                         | 2                   | 6           |
| Bradvik, 2000            |               | X            |              | Mood disorder                | ECT                | No ECT           | 178               | 2                                             | 0                         | 2                   | 4           |
| Liang, 2018              |               |              | X            | Mood disorder                | ECT                | No ECT           | 2,435             | 3                                             | 1                         | 2                   | 6           |
| Milstein, 1986           |               | X            |              | Psychotic disorder, Others   | ECT                | No ECT           | 32                | 3                                             | 0                         | 2                   | 5           |
| Sharma, 1999             |               | X            |              | Mood and psychotic disorders | ECT                | No ECT           | 90                | 1                                             | 0                         | 1                   | 2           |
| Tsuang, 1979             |               |              | X            | Psychotic Disorder           | ECT                | No ECT           | 74                | 4                                             | 0                         | 2                   | 6           |
| Nordenskjold, 2013       | X             |              |              | Mood disorders               | ECT                | No ECT           | 56                | 4                                             | 2                         | 3                   | 9           |
| Huston and Locher, 1948a |               |              | X            | Psychotic Disorder           | ECT                | No ECT           | 154               | 3                                             | 0                         | 2                   | 5           |
| Huston and Locher, 1948b |               |              | X            | Psychotic Disorder           | ECT                | No ECT           | 154               | 3                                             | 0                         | 2                   | 5           |

|                              |  |  |   |     |     |        |               |   |   |   |   |
|------------------------------|--|--|---|-----|-----|--------|---------------|---|---|---|---|
| Babigian and Guttmacher 1984 |  |  | X | MDD | ECT | No ECT | *37,729<br>PY | 4 | 0 | 2 | 6 |
|------------------------------|--|--|---|-----|-----|--------|---------------|---|---|---|---|

*\*Person counts could not be obtained from published literature. In this case, person-years (PY) is given. RCT – randomized controlled trial. PTSD – posttraumatic stress disorder; MDD – major depressive disorder*

Table S4. Characteristics Antipsychotics studies

| Study          | Type of study |              |              | Indication for treatment | Intervention group         | Comparison group      | Total Sample Size | Appraisal of Quality (Newcastle-Ottawa Scale) |                           |                     |             |
|----------------|---------------|--------------|--------------|--------------------------|----------------------------|-----------------------|-------------------|-----------------------------------------------|---------------------------|---------------------|-------------|
|                | RCT           | Case-control | Cohort study |                          |                            |                       |                   | Selection (range 0-4)                         | Comparability (range 0-2) | Outcome (range 0-3) | Total (0-9) |
| Storosum, 2003 | X             |              |              | Psychotic disorder       | Antipsychotic              | Placebo               | 7,152             |                                               | 0                         |                     |             |
| Tiihonen, 2006 |               |              | X            | Psychotic disorder       | Antipsychotic              | No Antipsychotic      | 8,026 PY          | 4                                             | 2                         | 2                   | 8           |
| Toffol, 2015   |               |              | X            | Bipolar                  | Antipsychotic              | No Antipsychotic      | 826               | 4                                             | 1                         | 3                   | 8           |
| Reutfors, 2013 |               | X            |              | Psychotic disorder       | Antipsychotic              | No Antipsychotic      | 168               | 3                                             | 0                         | 2                   | 5           |
| Modestin, 1992 |               | X            |              | RDC diagnosis            | Antipsychotic              | No Antipsychotic      | 128               | 1                                             | 0                         | 3                   | 4           |
| Hayes 2016     |               |              | X            | Bipolar                  | Olanzapine/<br>Quetiapine  | Lithium               | 5,001             | 4                                             | 2                         | 3                   | 9           |
| Hayes 2016     |               |              | X            | Bipolar                  | Olanzapine/<br>Quetiapine  | Valproate             | 4,523             | 4                                             | 2                         | 3                   | 9           |
| Tohen 2005     | X             |              |              | Bipolar                  | Olanzapine                 | Lithium               | 431               | 4                                             | 2                         | 3                   | 9           |
| Ahlfors 1981   | X             |              |              | Mood disorders           | Flupenthixol<br>decanoate  | Lithium               | 219               | 3                                             | 2                         | 2                   | 7           |
| Ahearn 2013    |               |              | X            | Bipolar                  | Atypical<br>antipsychotics | No Antipsychotic      | 1,910             | 4                                             | 0                         | 3                   | 7           |
| Angst 2005     |               |              | X            | Mood disorders           | Antipsychotic              | No Antipsychotic      | 406               | 2                                             | 0                         | 2                   | 4           |
| Nasrallah 2010 | X             |              |              | Psychotic disorder       | Paliperidone               | Placebo               | 515               | 4                                             | 2                         | 3                   | 9           |
| Khan 2013      | X             |              |              | Psychotic disorder       | Atypical<br>antipsychotics | Placebo               | 30,067            | 4                                             | 2                         | 2                   | 8           |
| Khan 2013      | X             |              |              | Bipolar                  | Atypical<br>antipsychotics | Placebo and/or<br>AED | 12,026            | 4                                             | 2                         | 2                   | 8           |

\*Person counts could not be obtained from published literature. In this case, person-years (PY) is given. RCT – randomized controlled trial.

Table S5. Characteristics of AED/Mood stabilizers studies

| Study             | Type of study |              |              | Indication for treatment     | Intervention group                                     | Comparison group        | Total Sample Size | Appraisal of Quality (Newcastle-Ottawa Scale) |                           |                     |             |
|-------------------|---------------|--------------|--------------|------------------------------|--------------------------------------------------------|-------------------------|-------------------|-----------------------------------------------|---------------------------|---------------------|-------------|
|                   | RCT           | Case-Control | Cohort Study |                              |                                                        |                         |                   | Selection (range 0-4)                         | Comparability (range 0-2) | Outcome (range 0-2) | Total (0-9) |
| *Sondergard, 2008 |               |              | X            | Bipolar                      | Divalproex, lamotrigine or oxcarbazepine               | Lithium                 | 5,926             | 4                                             | 0                         | 3                   | 7           |
| Smith, 2014       |               |              | X            | Mood and psychotic disorders | Valproate                                              | Lithium                 | 42,388            | 4                                             | 2                         | 3                   | 9           |
| Collins, 2008     |               |              | X            | Bipolar                      | Mood stabilizers                                       | Lithium                 | 11,787            | 4                                             | 0                         | 3                   | 7           |
| Smith, 2009       |               |              | X            | Bipolar                      | Carbamazepine, valproate, lamotrigine or oxcarbazepine | Lithium                 | 16,645            | 4                                             | 1                         | 2                   | 7           |
| Toffol, 2015      |               |              | X            | Bipolar                      | AED/Mood stabilizers                                   | No AED/Mood stabilizers | 826               | 4                                             | 1                         | 3                   | 8           |
| Hayes, 2016       |               |              | X            | Bipolar                      | Valproate                                              | Lithium                 | 3,818             | 4                                             | 2                         | 3                   | 9           |
| Hayes, 2016       |               |              | X            | Bipolar                      | Valproate                                              | No AED/Mood stabilizers | 2,853             | 4                                             | 2                         | 3                   | 9           |
| Modestin 1992     |               | X            |              | Mood and psychotic disorders | AED/Mood stabilizers                                   | No AED/Mood stabilizers | 128               | 3                                             | 0                         | 3                   | 6           |
| Goodwin 2003      |               |              | X            | Bipolar                      | Carbamazepine, Valproate                               | Lithium                 | **19,326 PY       | 4                                             | 1                         | 2                   | 8           |
| Goodwin 2003      |               |              | X            | Bipolar                      | Carbamazepine, Valproate                               | No AED/Mood stabilizers | **26,033 PY       | 4                                             | 1                         | 2                   | 8           |
| Tsai 2016         |               |              | X            | Bipolar                      | Carbamazepine, Valproate                               | Lithium                 | 3,395             | 4                                             | 2                         | 3                   | 9           |
| Tsai 2016         |               |              | X            | Bipolar                      | Carbamazepine, Valproate                               | No AED/Mood stabilizers | 1,373             | 4                                             | 2                         | 3                   | 9           |
| Calabrese 2003    | X             |              |              | Bipolar                      | Lamotrigine                                            | Lithium                 | 342               | 4                                             | 2                         | 2                   | 8           |

|                |   |  |   |                          |                                       |                         |        |   |   |   |   |
|----------------|---|--|---|--------------------------|---------------------------------------|-------------------------|--------|---|---|---|---|
| Calabrese 2003 | X |  |   | Bipolar                  | Lamotrigine                           | Placebo                 | 121    | 4 | 2 | 2 | 8 |
| Licht 2010     | X |  |   | Bipolar                  | Lamotrigine                           | Lithium                 | 155    | 4 | 2 | 3 | 9 |
| Greil 1997a    | X |  |   | Bipolar                  | Carbamazepine                         | Lithium                 | 175    | 4 | 2 | 2 | 8 |
| Greil 1997b    | X |  |   | Schizoaffective disorder | Carbamazepine                         | Lithium                 | 110    | 4 | 2 | 2 | 8 |
| Song 2017      |   |  | X | Bipolar                  | Valproate                             | Lithium                 | 29,540 | 4 | 2 | 3 | 9 |
| Leon 2012      |   |  | X | Bipolar                  | Carbamazepine, Lamotrigine, Valproate | No AED/Mood stabilizers | 199    | 4 | 1 | 2 | 7 |
| Ahearn 2013    |   |  | X | Bipolar                  | Valproate                             | No AED/Mood stabilizers | 2,165  | 4 | 0 | 3 | 7 |
| Ahearn 2013    |   |  | X | Bipolar                  | Valproate                             | Lithium                 | 1,551  | 4 | 0 | 3 | 7 |

*\*For Sondergard et al 2008, we used the conservative definition of 1 prescription of medication.*

*\*\*Person counts could not be obtained from published literature. In this case, person-years (PY) is given.*

*RCT – randomized controlled trial.*
