# Supplementary material for: Pharmacological and Somatic Treatment Effects on Suicide in Adults: A Systematic Review and Meta-Analysis
Source: Atypon-hosted journal article supplement (doi:10.1176/appi.focus.23021006), 2023-04-01
Supplement: appi.focus.23021006.ds009.pdf [file appi.focus.23021006.ds009.pdf]

**Table S6. Key Excluded Studies and Reasons for Exclusion**

| <b>Author Name</b>         | <b>Year</b> | <b>PMID</b>  | <b>Treatment of Interest</b> | <b>Reason for Exclusion</b>                                                                            |
|----------------------------|-------------|--------------|------------------------------|--------------------------------------------------------------------------------------------------------|
| Kessing                    | 2005        | 16061763     | Lithium                      | Comparison to general population (not psychiatric population)                                          |
| Hui                        | 2018        | 29551618     | Antipsychotics               | Cannot clearly attribute outcome to a given treatment group                                            |
| Stralin and Hetta          | 2019        | 29888512     | Antipsychotics               | Insufficient data                                                                                      |
| Olesen                     | 2010        | 20235081     | AED                          | Not focusing on a population with clearly defined mental health diagnosis                              |
| Koukopoulos                | 1995        | 7653332      | Lithium                      | Insufficient data                                                                                      |
| Munk-Olsen                 | 2007        | 17470959     | ECT                          | Insufficient data (no data indicating sample size of each group)                                       |
| Avery and Winokur          | 1976        | 962487       | ECT                          | Duplicate data (see Avery and Winokur 1978)                                                            |
| Ziskind                    | 1945        | Unavailable* | ECT                          | Unclear to which treatment groups suicide deaths should be attributed                                  |
| Bradvik                    | 2006        | 16315268     | ECT                          | Duplicate data (see Bradvik et al 2000)                                                                |
| Hunt                       | 2011        | 21208662     | ECT                          | No non-suicide comparison group                                                                        |
| Yerevanian                 | 2003        | 12547290     | AED                          | One suicide death was reported, but it was unclear to which treatment group this should be attributed. |
| Schwarzenbach and Modestin | 1993        | 8479589      | AED                          | Duplicate data (see Modestin et al 1992)                                                               |
| Pacchiarotti               | 2011        | 20817267     | AED                          | No suicide deaths reported                                                                             |
| Patorno                    | 2010        | 20388896     | AED                          | Not focusing on a population with clearly defined mental health diagnosis                              |
| Thies-Flechtner            | 1996        | 8738314      | Lithium                      | Duplicate data (see Greil et al                                                                        |
| Prien                      | 1974        | 4587809      | Lithium                      | Duplicate data (see Prien et al 1973 studies)                                                          |
| Broderson                  | 2000        | 10912217     | Lithium                      | Comparison to general population (not psychiatric population)                                          |
| Ahrens                     | 2001        | 11518473     | Lithium                      | No non-lithium comparison group                                                                        |
| Leith                      | 2019        | 30383553     | Lithium                      | Cannot distinguish between suicide death and non-fatal suicide attempt                                 |
| Coppen                     | 1991        | 1774419      | Lithium                      | Used historical comparison group                                                                       |
| Sharma                     | 1994        | 8071480      | Lithium                      | Patients matched on all-cause mortality not suicide                                                    |
| Marangell                  | 2008        | 18399724     | Lithium                      | Cannot distinguish between suicide death and non-fatal suicide attempt                                 |
| Gonzalez-Pinto             | 2006        | 17042834     | Lithium                      | No non-lithium group (compares poorly adherent lithium to adherent lithium users)                      |

|                      |      |          |                |                                                                                                                                      |
|----------------------|------|----------|----------------|--------------------------------------------------------------------------------------------------------------------------------------|
| Nilsson and Axelsson | 1990 | 2127155  | Lithium        | No report on suicide death (two reported suicides are not included in the analysis of the paper)                                     |
| Rihmer               | 1993 | 8481204  | Lithium        | No report on suicides                                                                                                                |
| Gazalle              | 2007 | 17435926 | Lithium        | No comparison group                                                                                                                  |
| Born                 | 2001 | 16020172 | Lithium        | No suicide deaths                                                                                                                    |
| Goldberg             | 2005 | 16339615 | Lithium        | No suicide deaths                                                                                                                    |
| Ahrens               | 1995 | 7759663  | Lithium        | No comparison group                                                                                                                  |
| Nilsson              | 1999 | 10073393 | Lithium        | Duplicate data (see Nilsson 1995)                                                                                                    |
| Brus                 | 2019 | 31189487 | Lithium        | Overlaps somewhat (not entirely) with data from Song et al 2017. A sensitivity analysis using this data strengthens lithium effects. |
| Koek                 | 2012 | 22749157 | Antipsychotic  | No suicide deaths                                                                                                                    |
| Storosum             | 2005 | 15800158 | Antipsychotic  | Cannot distinguish treatment of interest (antipsychotic v. antiepileptic mood stabilizer). This study was used for lithium.          |
| Tiihonen             | 2009 | 19595447 | Antipsychotic  | Reference group was other antipsychotics. This study was used for clozapine.                                                         |
| Gibbons              | 2009 | 19996040 | Antipsychotic  | No suicide death (only attempts)                                                                                                     |
| Suttajit             | 2013 | 23728667 | Antipsychotic  | Reference group was other antipsychotics                                                                                             |
| Karayal              | 2011 | 21450154 | Antipsychotic  | No suicide death                                                                                                                     |
| Meltzer              | 1995 | 7840350  | Clozapine      | No suicide deaths reported                                                                                                           |
| Kiviniemi            | 2013 | 23953217 | Clozapine      | Duplicate data (Tiihonen et al 2009)                                                                                                 |
| Yood                 | 2010 | 20925132 | Antipsychotic  | Cannot distinguish between suicide death and non-fatal suicide attempt                                                               |
| Reid                 | 1999 | 10037167 | Clozapine      | Duplicate data (Reid et al 1998)                                                                                                     |
| Haukka               | 2008 | 18327869 | Clozapine      | Duplicate data (Tiihonen et al 2009)                                                                                                 |
| Wagstaff and Perry   | 2003 | 12665398 | Clozapine      | Duplicate data                                                                                                                       |
| Modai                | 2000 | 10831019 | Clozapine      | Did not account for diagnosis differences between groups                                                                             |
| Munro                | 1999 | 10789357 | Clozapine      | Used historical comparison group                                                                                                     |
| Tiihonen             | 2012 | 22566579 | Antipsychotic  | Investigating polypharmacy (unclear treatment allocation effects)                                                                    |
| Kleindienst          | 2000 | 11093063 | Lithium        | Duplicate data (see Greil et al studies)                                                                                             |
| Shah                 | 1999 | 10466321 | Antipsychotic  | Insufficient data                                                                                                                    |
| Nilsson              | 2002 | 12060025 | AED/MS         | Not focusing on a population with clearly defined mental health diagnosis                                                            |
| Khan                 | 2006 | 17065970 | Antipsychotics | Duplicate data (Khan et al 2013)                                                                                                     |
| Khan                 | 2001 | 11532730 | Antipsychotics | Duplicate data (Khan et al 2013)                                                                                                     |
| Plan                 | 2019 | 31302523 | Various        | No clear comparison group                                                                                                            |

PMID – PubMed Identifier

\*Full citation: Ziskin E, Somerfeld-Ziskind E, Ziskind L. Metrazole and electric convulsive therapy of the affective psychoses: a controlled series of observations covering a period of five years. *Arch Neuropsych.* 1945;53(3):212-217.
