# Supplementary figures and images for: Pharmacological and Somatic Treatment Effects on Suicide in Adults: A Systematic Review and Meta-Analysis
Source: Atypon-hosted journal article supplement (doi:10.1176/appi.focus.23021006), 2023-04-01

# Funnel plot

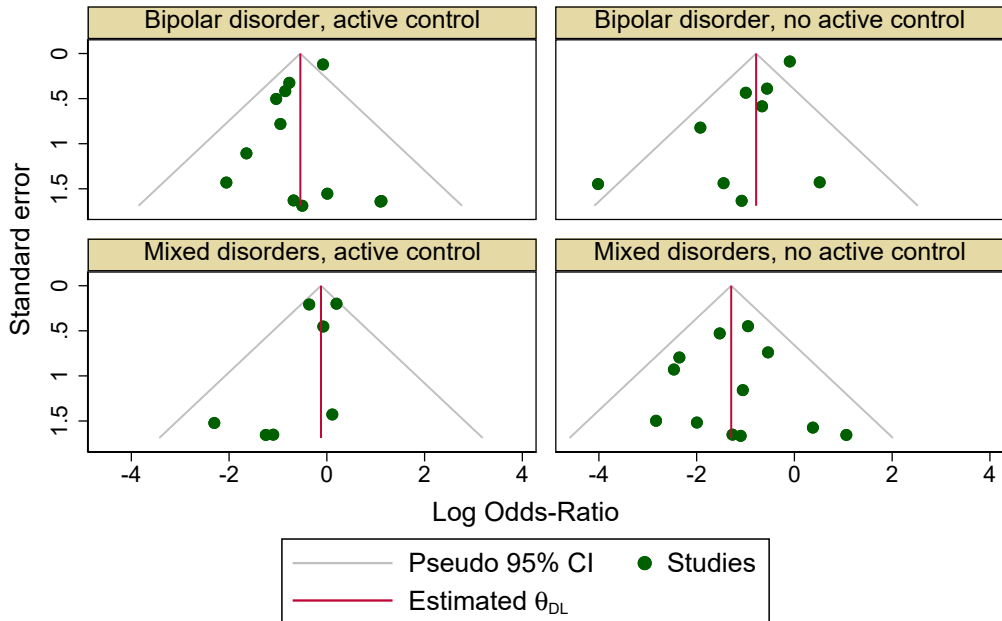

Figure S2

Supplement: appi.focus.23021006.ds002.pdf [file appi.focus.23021006.ds002.pdf]

**Figure S1.** PRISMA diagram of studies identified for potential eligibility.

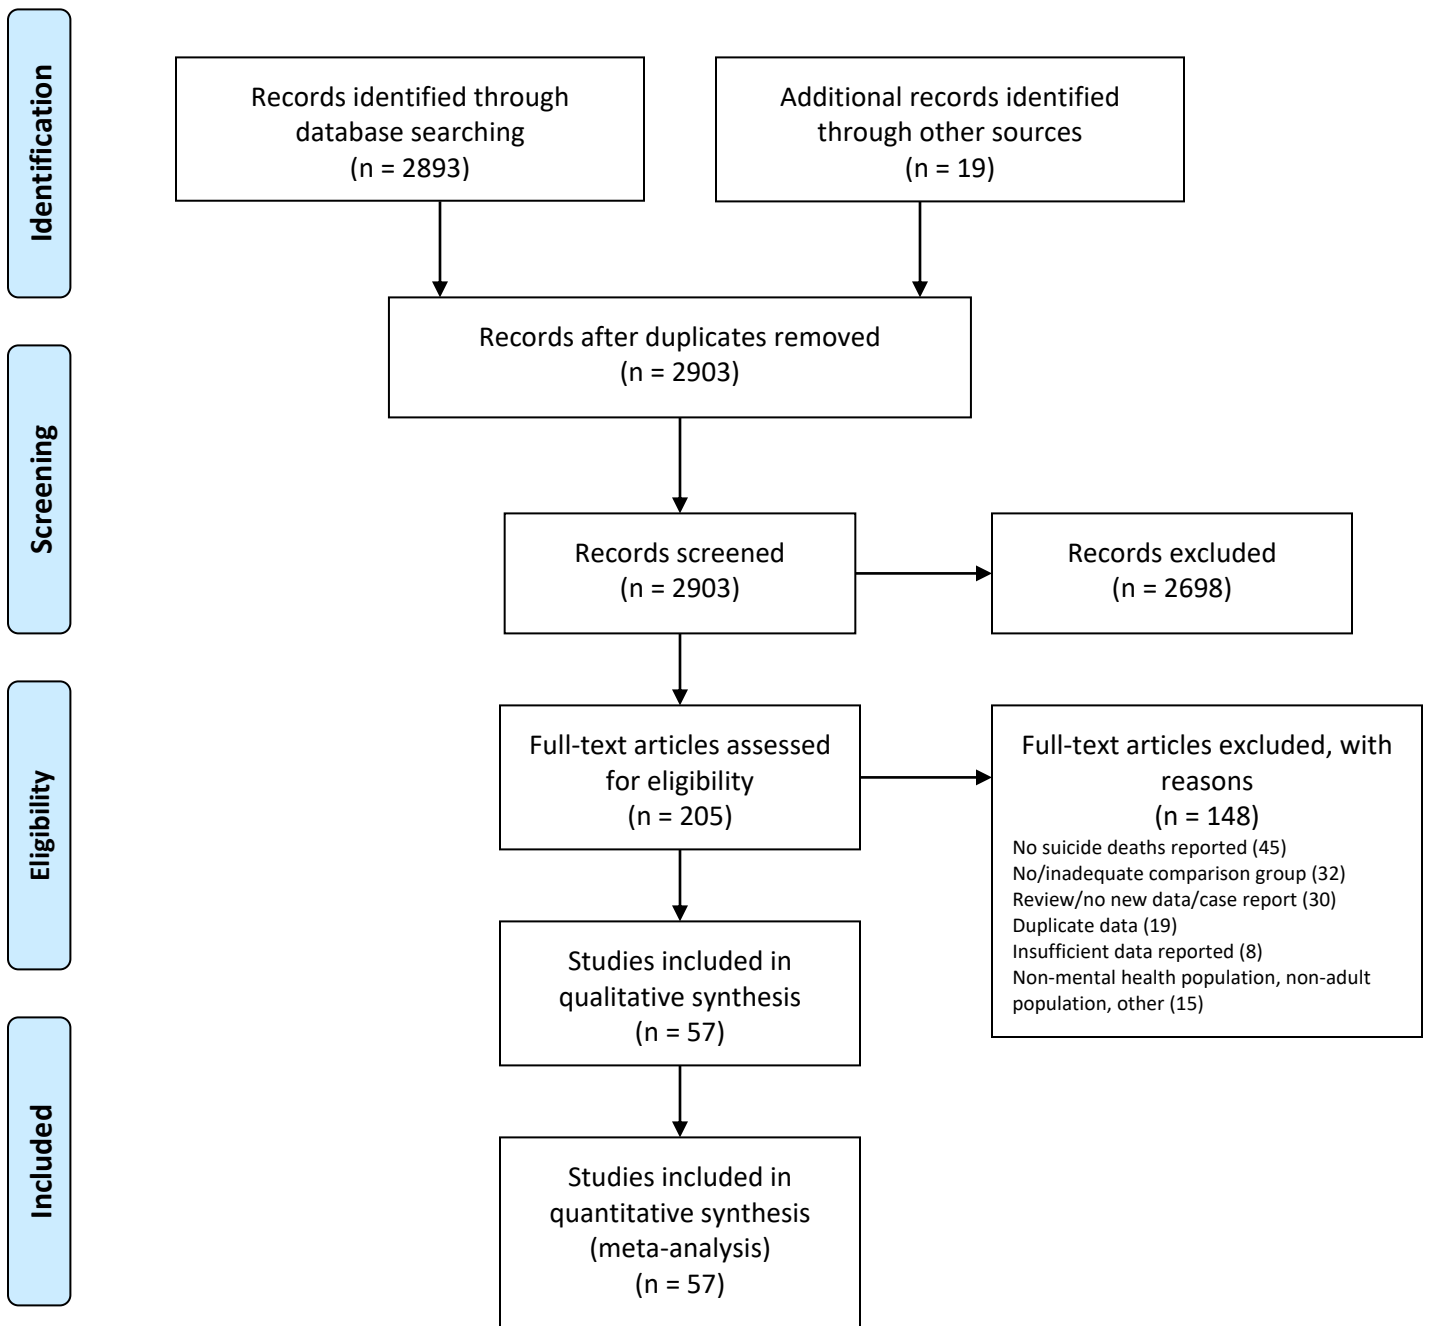

Supplement: appi.focus.23021006.ds001.pdf [file appi.focus.23021006.ds001.pdf]

# Funnel plot

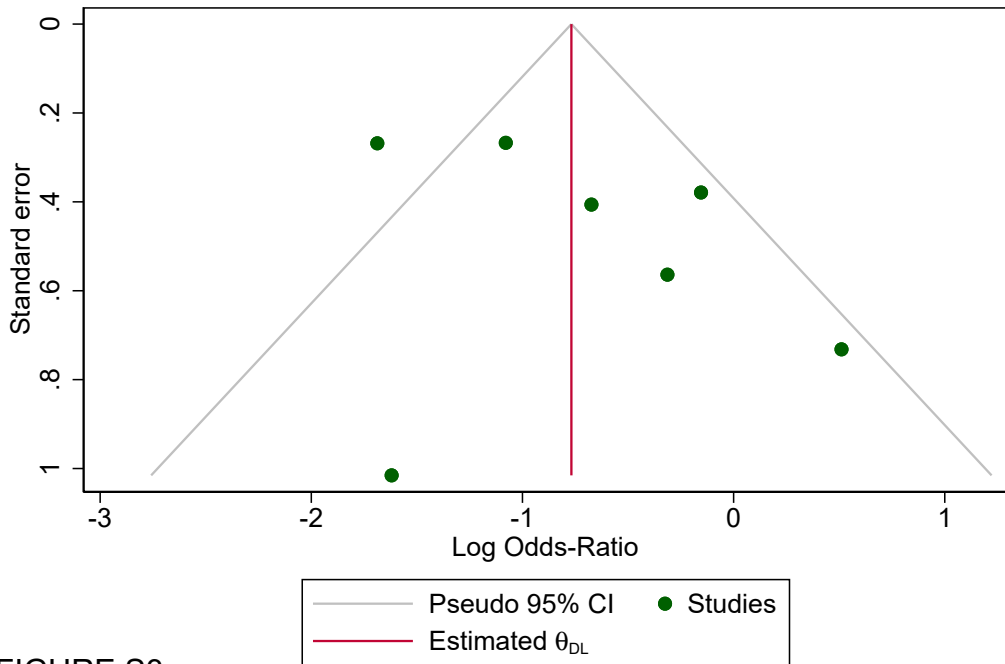

FIGURE S3.

Supplement: appi.focus.23021006.ds003.pdf [file appi.focus.23021006.ds003.pdf]

# Funnel plot

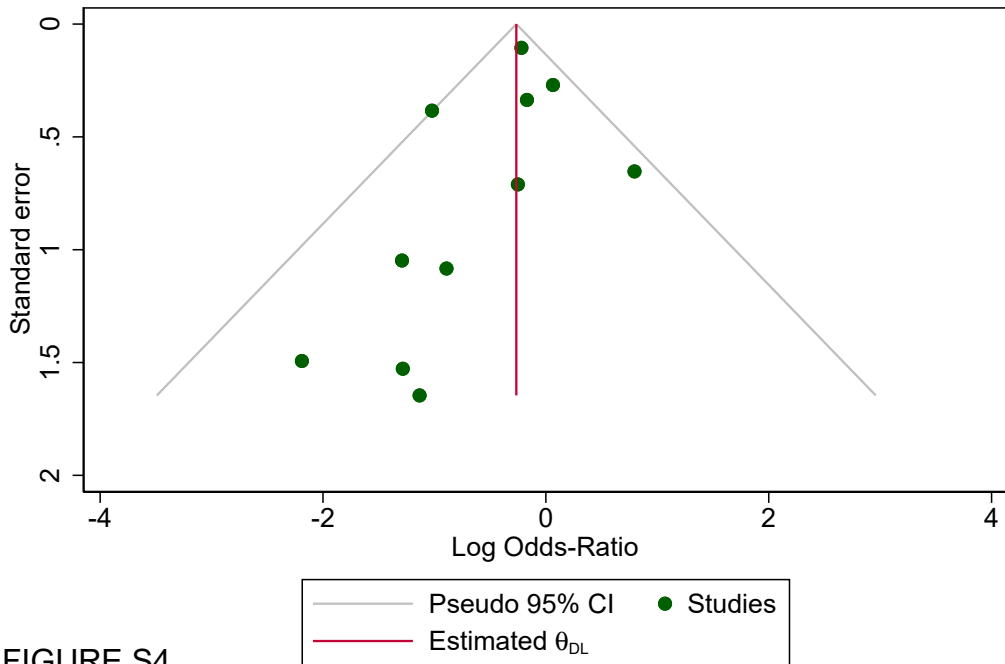

FIGURE S4.

Supplement: appi.focus.23021006.ds004.pdf [file appi.focus.23021006.ds004.pdf]

# Funnel plot

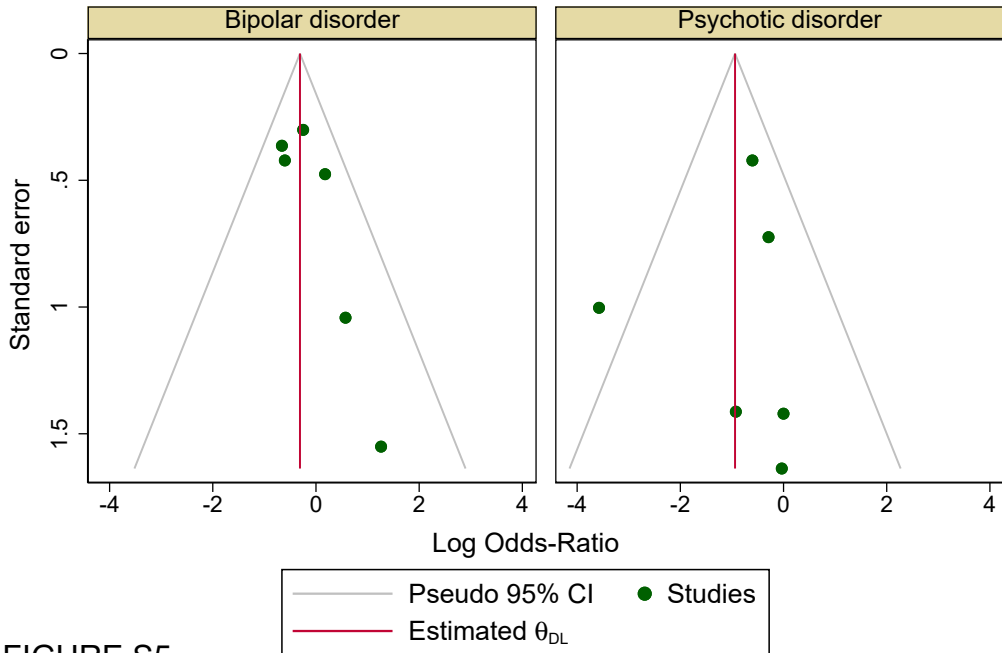

FIGURE S5.

Supplement: appi.focus.23021006.ds005.pdf [file appi.focus.23021006.ds005.pdf]

# Funnel plot

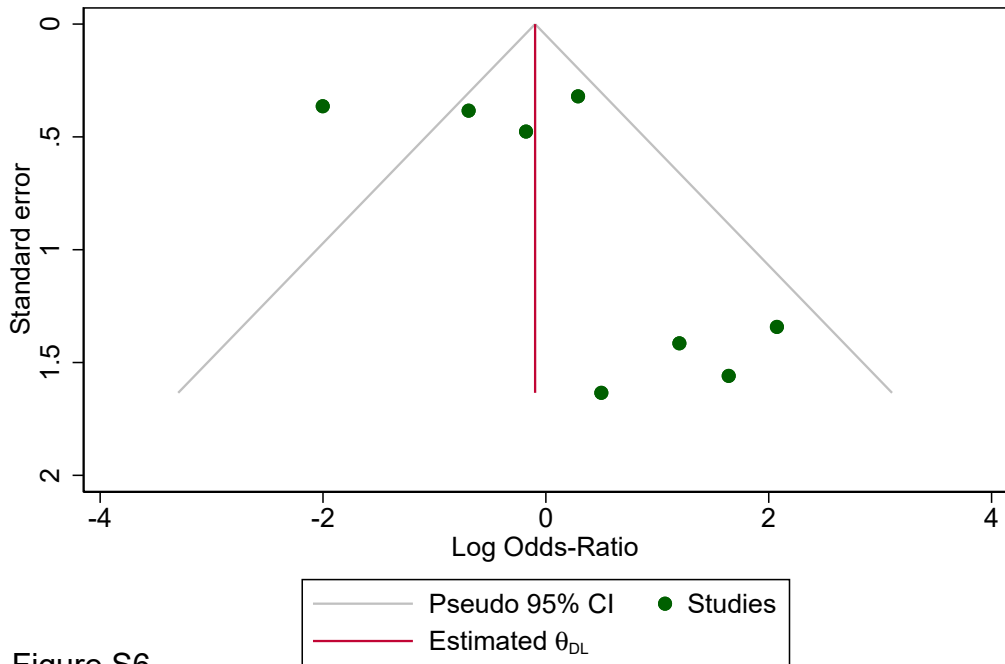

Supplement: appi.focus.23021006.ds006.pdf [file appi.focus.23021006.ds006.pdf]
